# Supplementary material
Source: PubMed Central journal article supplement (PMC3425845)
Supplement: supp_WNL.0b013e318266fc9a_Appendix_e-1.pdf [file supp_WNL.0b013e318266fc9a_Appendix_e-1.pdf]

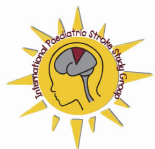

**PAEDIATRIC STROKE OUTCOME MEASURE SHORT NEURO EXAM (PSOM-SNE) INFANT VERSION  
(INFANTS TERM BIRTH TO 2 YEARS)**

**IDENTIFYING DATA**

**IPSS ID#** \_\_\_\_\_ **Site:** \_\_\_\_\_ **Date of assessment (yyyy-mm-dd):** \_\_\_\_\_

**Type of Assessment:**  Initial visit  Follow-up **Location of Assessment:**  In-patient  Clinic

**INSTRUCTIONS:** Check appropriate column for each item: Abnormal; Normal or Not Done (includes not age appropriate item)

**LEVEL OF CONSCIOUSNESS**

| TEST ITEM              | Normal | Abnormal | Notes |
|------------------------|--------|----------|-------|
| Level Of Consciousness |        |          |       |

**BEHAVIOUR, MENTAL STATUS**

| TEST ITEMS                | Not Done | Normal | Abnormal | Guidelines for Scoring                                             |
|---------------------------|----------|--------|----------|--------------------------------------------------------------------|
| Activity Level            |          |        |          | Excessively quiet, shy, removed, Hyperactive, fidgety              |
| Interpersonal Interaction |          |        |          | With parents and examiner                                          |
| Cooperation               |          |        |          | Age dependent                                                      |
| Attention                 |          |        |          |                                                                    |
| Affect                    |          |        |          | Extremely shy, withdrawn totally flat, gaze avoidance, hyperactive |
| Object Permanence         |          |        |          | Test Ages 4–12 Months. Should be present by 8 Months               |

**LANGUAGE**

| TEST ITEMS           | Not Done | Normal | Abnormal | Guidelines for Scoring                                                                                                                                                                                               |
|----------------------|----------|--------|----------|----------------------------------------------------------------------------------------------------------------------------------------------------------------------------------------------------------------------|
| Language Development |          |        |          | <b>Normal:</b><br><b>0-4 mos.</b> - Coos <b>4-12 mos.</b> - babbles<br><b>by 12 mos.</b> - 1-2 words <b>12-18 mos.</b> - single words<br><b>2 years.</b> - 2 word phrase <b>3 years</b> - 3 word sentence, 200 words |

**CRANIAL NERVES**

| TEST ITEMS                    | Not Done | Normal | Abnormal | Guidelines for Scoring and Notes (Describe Abnormalities)                                                                                             |
|-------------------------------|----------|--------|----------|-------------------------------------------------------------------------------------------------------------------------------------------------------|
| Visual Fields / Vision        | Right    |        |          | Facing patient at 2–3 ft encourage to stare at your eyes and tell when they see object come into view from side (or note gaze shifting toward object) |
|                               | Left     |        |          |                                                                                                                                                       |
| Pupillary Light Reflex        | Right    |        |          | Direct and Consensual                                                                                                                                 |
|                               | Left     |        |          |                                                                                                                                                       |
| Funduscopy                    | Right    |        |          | Note Abnormalities:                                                                                                                                   |
|                               | Left     |        |          |                                                                                                                                                       |
| Ocular Motility               | Right    |        |          | Move pen or red object or light smoothly from right to left and back testing full range. Watch for nystagmus or dysconjugate eye movements            |
|                               | Left     |        |          |                                                                                                                                                       |
| Optokinetic Nystagmus         | Right    |        |          | Test from 6 mos: move measuring tape slowly from right to left and back through full range encourage to 'look at the lines'                           |
|                               | Left     |        |          |                                                                                                                                                       |
| Facial Sensation              | Right    |        |          | Touch each side with light touch and cold object comparing forehead, cheek and chin R / L: watch for child's reaction                                 |
|                               | Left     |        |          |                                                                                                                                                       |
| Facial Movements              | Right    |        |          | Observe smile, observe mouth symmetry during vocalization. Listen to speech quality, observe eye closure for symmetry                                 |
|                               | Left     |        |          |                                                                                                                                                       |
| Hearing                       | Right    |        |          | Finger-rub for infants or whisper at 2 - 3 feet away.                                                                                                 |
|                               | Left     |        |          |                                                                                                                                                       |
| Swallow                       |          |        |          |                                                                                                                                                       |
| Palate and gag                | Right    |        |          | Observe during open mouth crying or demonstrate with tongue protruded 'Say 'ahhhhh.' Listen to voice quality                                          |
|                               | Left     |        |          |                                                                                                                                                       |
| Trapezius Strength            | Right    |        |          | Test Shoulder Shrug                                                                                                                                   |
|                               | Left     |        |          |                                                                                                                                                       |
| Tongue Movements Side-To-Side | Right    |        |          |                                                                                                                                                       |
|                               | Left     |        |          |                                                                                                                                                       |

## INFANT GROSS MOTOR

### Infant Primitive Reflexes (Test Only Infants <12 months of age)

| TEST ITEMS                    | Not Done | Normal | Abnormal | Guidelines for Scoring                                                                             |
|-------------------------------|----------|--------|----------|----------------------------------------------------------------------------------------------------|
| Sucking Reflex                |          |        |          |                                                                                                    |
| Rooting Reflex                |          |        |          |                                                                                                    |
| Palmer Grasp Reflex           | Right    |        |          | ≤ 4 months                                                                                         |
|                               | Left     |        |          |                                                                                                    |
| Plantar Grasp Reflex          | Right    |        |          | ≤ 12 months                                                                                        |
|                               | Left     |        |          |                                                                                                    |
| Stepping and Placing Reflexes | Right    |        |          | ≤ 6 months                                                                                         |
|                               | Left     |        |          |                                                                                                    |
| Asymmetric Tonic Neck Reflex  |          |        |          | ≤ 6 months                                                                                         |
| Moro Reflex                   | Right    |        |          | ≤ 6 months                                                                                         |
|                               | Left     |        |          |                                                                                                    |
| Parachute Reflex              | Right    |        |          | <b>Symmetry Norms:</b><br>Downward By ≤ 6 months<br>Sideways By ≤ 8 months<br>Forward By 12 months |
|                               | Left     |        |          |                                                                                                    |

### Developmental Gross Motor

**Test Only:** Infants <2 Yrs OR Children ≥2 Yrs without Independent Ambulatory Motor Function

| TEST ITEMS                                     | Not Done | Normal | Abnormal | Guidelines for Scoring |
|------------------------------------------------|----------|--------|----------|------------------------|
| Central Tone: Head lag on 'pull-to-sit'        |          |        |          |                        |
| Central Tone: Slip Thru On Vertical Suspension |          |        |          |                        |
| Central Tone: Tone on Ventral Suspension       |          |        |          |                        |
| Rolls Over (Front To Back)                     |          |        |          | By ≤ 5 Mos.            |
| Rolls Over (Back To Front)                     |          |        |          | By ≤ 5 Mos.            |
| Sits Alone                                     |          |        |          | By ≤ 8 Mos.            |
| Moves From Laying To Sitting Unassisted        |          |        |          | ≤ 10 Mos.              |
| Weight-Bearing, Supported                      |          |        |          |                        |
| Walks Holding On                               |          |        |          | By ≤ 15 Mos.           |
| Walks Independently                            |          |        |          | By < 16 Mos.           |

## MOTOR TESTING

|                           | POWER    |        |          | TONE     |        |          | INVOLUNTARY MOVEMENTS* |        |          |
|---------------------------|----------|--------|----------|----------|--------|----------|------------------------|--------|----------|
|                           | Not Done | Normal | Abnormal | Not Done | Normal | Abnormal | Not Done               | Normal | Abnormal |
| <b>Neck/Trunk Muscles</b> |          |        |          |          |        |          |                        |        |          |
| <b>Right Arm</b>          |          |        |          |          |        |          |                        |        |          |
| Proximal                  |          |        |          |          |        |          |                        |        |          |
| Distal                    |          |        |          |          |        |          |                        |        |          |
| <b>Left Arm</b>           |          |        |          |          |        |          |                        |        |          |
| Proximal                  |          |        |          |          |        |          |                        |        |          |
| Distal                    |          |        |          |          |        |          |                        |        |          |
| <b>Right Leg</b>          |          |        |          |          |        |          |                        |        |          |
| Proximal                  |          |        |          |          |        |          |                        |        |          |
| Distal                    |          |        |          |          |        |          |                        |        |          |
| <b>Left Leg</b>           |          |        |          |          |        |          |                        |        |          |
| Proximal                  |          |        |          |          |        |          |                        |        |          |
| Distal                    |          |        |          |          |        |          |                        |        |          |

**\*Type of Involuntary Movements Seen**  
 Check all that are present

| TYPE               | ?Present |
|--------------------|----------|
| Limb Tremor        |          |
| Choreoathetosis    |          |
| Dystonic Posturing |          |
| Tics               |          |

### TENDON REFLEXES

| TEST ITEMS            |       | Not Done | Normal | Abnormal | Guidelines for Scoring               |
|-----------------------|-------|----------|--------|----------|--------------------------------------|
| Biceps                | Right |          |        |          |                                      |
|                       | Left  |          |        |          |                                      |
| Brachioradialis       | Right |          |        |          |                                      |
|                       | Left  |          |        |          |                                      |
| Triceps               | Right |          |        |          |                                      |
|                       | Left  |          |        |          |                                      |
| Knee Jerk             | Right |          |        |          |                                      |
|                       | Left  |          |        |          |                                      |
| Quadriceps            | Right |          |        |          |                                      |
|                       | Left  |          |        |          |                                      |
| Ankle Jerk            | Right |          |        |          |                                      |
|                       | Left  |          |        |          |                                      |
| Babinski              | Right |          |        |          | Upgoing toe is normal up to one year |
|                       | Left  |          |        |          |                                      |
| Elicited ankle clonus | Right |          |        |          |                                      |
|                       | Left  |          |        |          |                                      |

### FINE MOTOR / COORDINATION

| TEST ITEMS                |       | Not Done | Normal | Abnormal | Guidelines for Scoring                                                                                                                  |
|---------------------------|-------|----------|--------|----------|-----------------------------------------------------------------------------------------------------------------------------------------|
| Pincer Grasp              | Right |          |        |          | Encourage to pick up small 2–3 mm. ball of rolled up paper                                                                              |
|                           | Left  |          |        |          |                                                                                                                                         |
| Rapid Tap Index Finger    | Right |          |        |          | Test from ~18 months: <b>"As fast as you can"</b> demonstrate index finger repetitively tapping with hands placed palms down on surface |
|                           | Left  |          |        |          |                                                                                                                                         |
| Reaching for object       | Right |          |        |          | Observe for unusual or asymmetric tremor on reaching for object                                                                         |
|                           | Left  |          |        |          |                                                                                                                                         |
| Sitting/ Standing Balance |       |          |        |          |                                                                                                                                         |

### SENSORY

| TEST ITEMS        |       | Not Done | Normal | Abnormal | Guidelines for Scoring |
|-------------------|-------|----------|--------|----------|------------------------|
| Light Touch       | Right |          |        |          |                        |
|                   | Left  |          |        |          |                        |
| Pin Prick or Cold | Right |          |        |          |                        |
|                   | Left  |          |        |          |                        |

### GAIT

Test Only if  $\geq$  12 months and walking without support

| TEST ITEMS   | Not Done | Normal | Abnormal | Guidelines for Scoring |
|--------------|----------|--------|----------|------------------------|
| Gait Walking |          |        |          | By $\geq$ 16 mos.      |
| Gait Running |          |        |          | By 2 yrs of age        |

## SCORING SHEET FOR PSOM-SNE

### SUMMARY OF IMPRESSIONS

After completing the PSOM-NE or equivalent detailed neurologic examination, summarize and grade your impressions in the following categories:

**A. Sensorimotor Deficit (ANY motor or sensory abnormality including Cranial Nerve Deficits, Visual, and Hearing deficits)**

|                                           | <u>R side</u> | <u>L side</u> |
|-------------------------------------------|---------------|---------------|
| Not Done                                  | n/t           | n/t           |
| None                                      | 0             | 0             |
| Mild but no impact on function            | 0.5           | 0.5           |
| Moderate with some functional limitations | 1             | 1             |
| Severe or Profound with missing function  | 2             | 2             |

**Select the Sensorimotor Deficits You Observed (select all that apply)**

- Global developmental delay                       Global hypotonia or hypertonia
- Hemiparesis     Hemifacial weakness     Hemiataxia     Dysarthria     Other Motor deficit
- Hemisensory deficit     Other Sensory deficit
- Difficulty with vision
- Difficulty with drinking, chewing or swallowing
- Other, describe: \_\_\_\_\_

**B. Language Deficit – Production (including dysarthria)**

|                                           |     |
|-------------------------------------------|-----|
| Not Done                                  | n/t |
| None                                      | 0   |
| Mild but no impact on function            | 0.5 |
| Moderate with some functional limitations | 1   |
| Severe or Profound with missing function  | 2   |

**Describe the Language Production Deficits You Observed Here:** \_\_\_\_\_

**C. Language Deficit - Comprehension**

|                                           |     |
|-------------------------------------------|-----|
| Not Done                                  | n/t |
| None                                      | 0   |
| Mild but no impact on function            | 0.5 |
| Moderate with some functional limitations | 1   |
| Severe or Profound with missing function  | 2   |

**Describe The Language Comprehension You Observed Here:** \_\_\_\_\_

**D. Cognitive or Behavioural Deficit (specify which)     Cognitive                       Behavioural**

|                                           |     |
|-------------------------------------------|-----|
| Not Done                                  | n/t |
| None                                      | 0   |
| Mild but no impact on function            | 0.5 |
| Moderate with some functional limitations | 1   |
| Severe or Profound with missing function  | 2   |

**Describe The Cognitive or Behavioural Deficits You Observed Here:** \_\_\_\_\_

**TOTAL SCORING:** \_\_\_\_\_ /10

1. Have you/your child recovered completely from the stroke?     Yes     No
2. Does your child need extra help with day-to-day activities compared to other children their age?     Yes     No
3. Has the stroke affected you/your child's emotional state, behavior and feelings about his/herself?     Yes     No  
Does your child show any signs of depression?     Yes     No
4. Does the child use aids or assistive devices (e.g. splints, braces)?     Yes     No    Specify: \_\_\_\_\_
