# Supplementary material
Source: PubMed Central journal article supplement (PMC3425845)
Supplement: supp_WNL.0b013e318266fc9a_Appendix_e-2.pdf [file supp_WNL.0b013e318266fc9a_Appendix_e-2.pdf]

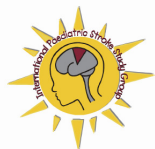

**PAEDIATRIC STROKE OUTCOME MEASURE SHORT NEURO EXAM (PSOM-SNE) - CHILD VERSION  
(CHILDREN AGED 2 YEARS AND OLDER)**

**IDENTIFYING DATA**

**IPSS ID#** \_\_\_\_\_ **Site:** \_\_\_\_\_ **Date of assessment** (yyyy-mm-dd): \_\_\_\_\_

**Type of Assessment:**  Initial visit  Follow-up **Location of Assessment:**  In-patient  Clinic

**INSTRUCTIONS:** Check appropriate column for each item: Abnormal; Normal or Not Done (includes not age appropriate item)

**LEVEL OF CONSCIOUSNESS**

| TEST ITEM              | Normal | Abnormal | Notes |
|------------------------|--------|----------|-------|
| Level Of Consciousness |        |          |       |

**BEHAVIOUR, MENTAL STATUS**

| TEST ITEMS                | Normal | Abnormal | Not Done | Guidelines for Scoring                                                                                                                                                                                                                                                                         |
|---------------------------|--------|----------|----------|------------------------------------------------------------------------------------------------------------------------------------------------------------------------------------------------------------------------------------------------------------------------------------------------|
| Activity Level            |        |          |          | <b>Abnormal:</b> Excessively quiet, shy, removed, hyperactive, fidgety, gets up, uncontrollable, spills, into everything                                                                                                                                                                       |
| Interpersonal Interaction |        |          |          | <b>Abnormal:</b> Clings to parent, aloof, withdrawn, gaze avoidance, punches                                                                                                                                                                                                                   |
| Cooperation               |        |          |          | Age-dependent                                                                                                                                                                                                                                                                                  |
| Attention                 |        |          |          | <b>Abnormal:</b> Short, distractible, flits, ignores, preoccupied, disorganized, inattentive                                                                                                                                                                                                   |
| Affect                    |        |          |          | <b>Abnormal:</b> Extremely shy, pouts or clings excessively or cries a lot for no reason, angry, totally flat, gaze avoidance, hyperactive, no sustained attention                                                                                                                             |
| Serial Numbers            |        |          |          | Age <b>24 mos -36 mos:</b> <b>Ask:</b> "Count as high as you can"<br>Age <b>4-8 years:</b> <b>Ask:</b> "Start at 20 count backwards"<br>Age <b>9-13 yrs:</b> <b>Ask:</b> "Start at 50 count backwards by 3's"<br>Age <b>13 yrs &amp; up:</b> <b>Ask:</b> "Start at 100 count backwards by 7's" |
| Drawing                   |        |          |          | <b>Ask</b> patient to draw circle, triangle, and cross, bisect vertical and horizontal lines, and draw clock on attached page                                                                                                                                                                  |
| Right/Left Orientation    |        |          |          | Test in patients older than 6 years age:<br>"Show me your left hand" and "Show me your right hand"                                                                                                                                                                                             |
| Memory, Delayed Recall    |        |          |          | <b>Instruct patient:</b> "I need you to memorize 3 words and will ask you to repeat them in 5 minutes. The words are " <b>Chair</b> ", " <b>Candle</b> ", " <b>Dog</b> " "Repeat them now to see if you have them."                                                                            |

## LANGUAGE

| TEST ITEMS                   | Normal | Abnormal | Not Done | Guidelines for Scoring                                                                                                                                                                                                                                                                                                          |
|------------------------------|--------|----------|----------|---------------------------------------------------------------------------------------------------------------------------------------------------------------------------------------------------------------------------------------------------------------------------------------------------------------------------------|
| Speech Development           |        |          |          | <b>Normal:</b><br><b>0-4 mos.</b> - Coos <b>4-12 mos.</b> - babbles<br><b>by 12 mos.</b> - 1-2 words <b>12-18 mos.</b> - single words<br><b>2 years.</b> - 2 word phrase <b>3 years</b> - 3 word sentence, 200 words                                                                                                            |
| Repetition                   |        |          |          | "Stop"; "Stop and Go"; "If it rains we play inside"; "No ifs ands or buts"<br>"The Prime Minister lives in Ottawa" (or local version!)                                                                                                                                                                                          |
| Naming                       |        |          |          | Show patient attached sheet with pictures: skateboard, pencil, shirt, bicycle, and clock.<br>Children ≥6 yrs. ask to identify: pencil, eraser, bicycle seat, buttons                                                                                                                                                            |
| Comprehension                |        |          |          | <b>Simple Tasks:</b> a. Close your eyes b. Touch your nose<br>c. Point to the floor and then ceiling<br><b>Complex 3 Step Command:</b> ask child to listen to the complete instruction, remember it, then do all 3 activities together when prompted: "Blink twice, stick out your tongue, then touch your finger to your nose" |
| Letter Recognition / Reading |        |          |          | Test age 5 yrs. & up<br>Ask patient to identify letters A, B, H                                                                                                                                                                                                                                                                 |
| Writing                      |        |          |          | Ask patient to print first name (age 5-7) first and last name (age 8-9) or write first and last name in cursive                                                                                                                                                                                                                 |

## CRANIAL NERVES

| TEST ITEMS                    |       | Normal | Abnormal | Not Done | Guidelines for Scoring and Notes<br>(Describe Abnormalities)                                                                                                    |
|-------------------------------|-------|--------|----------|----------|-----------------------------------------------------------------------------------------------------------------------------------------------------------------|
| Visual Fields                 | Right |        |          |          | Facing patient at 2 – 3 ft encourage to stare at your eyes and tell when they see object come into view from side (or note gaze shifting toward object)         |
|                               | Left  |        |          |          |                                                                                                                                                                 |
| Pupillary Light Reflex        | Right |        |          |          | Direct and Consensual                                                                                                                                           |
|                               | Left  |        |          |          |                                                                                                                                                                 |
| Fundoscopy                    | Right |        |          |          | Note Abnormalities:                                                                                                                                             |
|                               | Left  |        |          |          |                                                                                                                                                                 |
| Ocular Motility               | Right |        |          |          | Move pen or red object or light smoothly from right to left and back testing full range. Watch for nystagmus or dysconjugate eye movements                      |
|                               | Left  |        |          |          |                                                                                                                                                                 |
| Optokinetic Nystagmus         | Right |        |          |          | Test from 6 mos: move measuring tape slowly from right to left and back through full range encourage to 'watch the numbers as they go by'                       |
|                               | Left  |        |          |          |                                                                                                                                                                 |
| Facial Sensation              | Right |        |          |          | Touch each side with light touch and cold object asking if child can feel or for older, 'is it the same on both sides' comparing forehead, cheek and chin R / L |
|                               | Left  |        |          |          |                                                                                                                                                                 |
| Facial Movements              | Right |        |          |          | Ask patient to smile, count to 10 watching mouth symmetry<br>Maximal eye closure strength "Squeeze eyes shut as tightly as you can"                             |
|                               | Left  |        |          |          |                                                                                                                                                                 |
| Hearing                       | Right |        |          |          | Finger rub for infants or whisper at 2-3 feet away.<br>For older have child repeat letters/numbers                                                              |
|                               | Left  |        |          |          |                                                                                                                                                                 |
| Swallow                       |       |        |          |          |                                                                                                                                                                 |
| Palate and gag                | Right |        |          |          | Observe during open mouth crying or Demonstrate with tongue protruded 'Say 'ahhhhh.'" Listen to voice quality                                                   |
|                               | Left  |        |          |          |                                                                                                                                                                 |
| Trapezius Strength            | Right |        |          |          | Test Shoulder Shrug                                                                                                                                             |
|                               | Left  |        |          |          |                                                                                                                                                                 |
| Tongue Movements Side-To-Side | Right |        |          |          |                                                                                                                                                                 |
|                               | Left  |        |          |          |                                                                                                                                                                 |

## MOTOR EXAM

### MOTOR TESTING

|                           | POWER  |          |            | TONE   |          |            | INVOLUNTARY MOVEMENTS* |                    |            |
|---------------------------|--------|----------|------------|--------|----------|------------|------------------------|--------------------|------------|
|                           | Normal | Abnormal | Not Tested | Normal | Abnormal | Not Tested | Normal (None)          | Abnormal (Present) | Not Tested |
| <b>Neck/Trunk Muscles</b> |        |          |            |        |          |            |                        |                    |            |
| <b>Right Arm</b>          |        |          |            |        |          |            |                        |                    |            |
| Proximal                  |        |          |            |        |          |            |                        |                    |            |
| Distal                    |        |          |            |        |          |            |                        |                    |            |
| <b>Left Arm</b>           |        |          |            |        |          |            |                        |                    |            |
| Proximal                  |        |          |            |        |          |            |                        |                    |            |
| Distal                    |        |          |            |        |          |            |                        |                    |            |
| <b>Right Leg</b>          |        |          |            |        |          |            |                        |                    |            |
| Proximal                  |        |          |            |        |          |            |                        |                    |            |
| Distal                    |        |          |            |        |          |            |                        |                    |            |
| <b>Left Leg</b>           |        |          |            |        |          |            |                        |                    |            |
| Proximal                  |        |          |            |        |          |            |                        |                    |            |
| Distal                    |        |          |            |        |          |            |                        |                    |            |

**\*Type of Involuntary Movements Seen**  
Check all that are present

| TYPE               | ?Present |
|--------------------|----------|
| Limb Tremor        |          |
| Choreoathetosis    |          |
| Dystonic Posturing |          |
| Tics               |          |

### TENDON REFLEXES

| TEST ITEMS            |       | Normal | Abnormal | Not Done | Guidelines for Scoring               |
|-----------------------|-------|--------|----------|----------|--------------------------------------|
| Biceps                | Right |        |          |          |                                      |
|                       | Left  |        |          |          |                                      |
| Brachioradialis       | Right |        |          |          |                                      |
|                       | Left  |        |          |          |                                      |
| Triceps               | Right |        |          |          |                                      |
|                       | Left  |        |          |          |                                      |
| Knee Jerk             | Right |        |          |          |                                      |
|                       | Left  |        |          |          |                                      |
| Quadriceps            | Right |        |          |          |                                      |
|                       | Left  |        |          |          |                                      |
| Ankle Jerk            | Right |        |          |          |                                      |
|                       | Left  |        |          |          |                                      |
| Babinski              | Right |        |          |          | Upgoing toe is normal up to one year |
|                       | Left  |        |          |          |                                      |
| Elicited ankle clonus | Right |        |          |          |                                      |
|                       | Left  |        |          |          |                                      |

### FINE MOTOR COORDINATION

| TEST ITEMS                        |       | Normal | Abnormal | Not Done | Guidelines for Scoring                                                                                         |
|-----------------------------------|-------|--------|----------|----------|----------------------------------------------------------------------------------------------------------------|
| Pincer Grasp                      | Right |        |          |          | Encourage to pick up small 2–3 mm. ball of rolled up paper                                                     |
|                                   | Left  |        |          |          |                                                                                                                |
| Rapid Sequential Finger Movements | Right |        |          |          | <b>Demonstrate:</b> thumb touches tip of individual fingers back and forth 5 times <i>"As fast as you can"</i> |
|                                   | Left  |        |          |          |                                                                                                                |
| Rapid Index Finger Tap            | Right |        |          |          | <b>Demonstrate:</b> seated, finger taps table top or own thigh X 20 times, <i>"As fast as you can"</i>         |
|                                   | Left  |        |          |          |                                                                                                                |
| Finger To Nose Testing            | Right |        |          |          |                                                                                                                |
|                                   | Left  |        |          |          |                                                                                                                |
| Heel To Shin Testing              | Right |        |          |          |                                                                                                                |
|                                   | Left  |        |          |          |                                                                                                                |
| Rapid Foot Tap                    | Right |        |          |          | <b>Demonstrate:</b> feet flat on floor, foot taps floor X 20 <i>"As fast as you can"</i>                       |
|                                   | Left  |        |          |          |                                                                                                                |
| Sitting/ Standing Balance         |       |        |          |          |                                                                                                                |

### SENSORY

| TEST ITEMS                  |       | Normal | Abnormal | Not Done | Guidelines for Scoring                                                          |
|-----------------------------|-------|--------|----------|----------|---------------------------------------------------------------------------------|
| Light Touch                 | Right |        |          |          | Use cotton swab and <b>ask:</b> <i>"Is it the same on both sides?"</i>          |
|                             | Left  |        |          |          |                                                                                 |
| Pin Prick Or Cold Sensation | Right |        |          |          | Use cool metal from tuning fork or reflex hammer                                |
|                             | Left  |        |          |          |                                                                                 |
| Proprioception              | Right |        |          |          | Great Toe up and down with eyes closed ( <b>ask:</b> <i>"up or down?"</i> )     |
|                             | Left  |        |          |          |                                                                                 |
| Graphesthesia/ Stereognosis | Right |        |          |          | Test >6 yrs: Eyes closed, draw number in palm & foot dorsum with closed pen tip |
|                             | Left  |        |          |          |                                                                                 |

### GAIT

| TEST ITEMS                   |       | Normal | Abnormal | Not Done | Guidelines for Scoring                                                    |
|------------------------------|-------|--------|----------|----------|---------------------------------------------------------------------------|
| Gait Walking                 |       |        |          |          | By $\geq$ 16 mos.                                                         |
| Gait Running                 |       |        |          |          | By 2 yrs age                                                              |
| Gait on Heels                |       |        |          |          |                                                                           |
| Gait on Toes                 |       |        |          |          | 10 steps                                                                  |
| Tandem Gait                  |       |        |          |          | Heel to toe: test > age 6 yrs; walk on line forward (10 steps)            |
| Jump on 2 Feet               |       |        |          |          | By $\geq$ 36 mos.                                                         |
| Hop on Foot repetitively     | Right |        |          |          | 25 x ( <i>age 7 yrs to 9 yrs.</i> )<br>50 x ( <i>age 9 yrs or older</i> ) |
|                              | Left  |        |          |          |                                                                           |
| Station on one leg sustained | Right |        |          |          | Test age 7 and up.<br>Count seconds out loud and compare stability.       |
|                              | Left  |        |          |          |                                                                           |
| Romberg's Sign               |       |        |          |          | <i>"Eyes closed, feet together, arms stretched forward".</i>              |

## SCORING SHEET FOR PSOM-SNE

### SUMMARY OF IMPRESSIONS

After completing the PSOM-NE or equivalent detailed neurologic examination, summarize and grade your impressions in the following categories:

**A. Sensorimotor Deficit (ANY motor or sensory abnormality including Cranial Nerve Deficits, Visual, and Hearing deficits)**

|                                           | <u>R side</u> | <u>L side</u> |
|-------------------------------------------|---------------|---------------|
| Not Done                                  | n/t           | n/t           |
| None                                      | 0             | 0             |
| Mild but no impact on function            | 0.5           | 0.5           |
| Moderate with some functional limitations | 1             | 1             |
| Severe or Profound with missing function  | 2             | 2             |
| Not Tested                                | n/t           | n/t           |

**Select the Sensorimotor Deficits You Observed (select all that apply)**

- Global developmental delay                       Global hypotonia or hypertonia  
 Hemiparesis     Hemifacial weakness     Hemiataxia     Dysarthria     Other Motor deficit  
 Hemisensory deficit     Other Sensory deficit  
 Difficulty with vision  
 Difficulty with drinking, chewing or swallowing  
 Other, describe: \_\_\_\_\_

**B. Language Deficit – Production (exclude dysarthria)**

|                                           |     |
|-------------------------------------------|-----|
| Not Done                                  | n/t |
| None                                      | 0   |
| Mild but no impact on function            | 0.5 |
| Moderate with some functional limitations | 1   |
| Severe or Profound with missing function  | 2   |
| Not Tested                                | n/t |

**Describe the Language Production Deficits You Observed Here:** \_\_\_\_\_

---

**C. Language Deficit - Comprehension**

|                                           |     |
|-------------------------------------------|-----|
| Not Done                                  | n/t |
| None                                      | 0   |
| Mild but no impact on function            | 0.5 |
| Moderate with some functional limitations | 1   |
| Severe or Profound with missing function  | 2   |
| Not Tested                                | n/t |

**Describe The Language Comprehension You Observed Here:** \_\_\_\_\_

---

**D. Cognitive or Behavioural Deficit (specify which)     Cognitive                       Behavioural**

|                                           |     |
|-------------------------------------------|-----|
| Not Done                                  | n/t |
| None                                      | 0   |
| Mild but no impact on function            | 0.5 |
| Moderate with some functional limitations | 1   |
| Severe or Profound with missing function  | 2   |
| Not Tested                                | n/t |

**Describe the Cognitive or Behavioural Deficits You Observed Here:** \_\_\_\_\_

---

**TOTAL SCORING:** \_\_\_\_\_ /10

**PICTURES TO ASSESS 'NAMING' (see Language on Page 1) (adapted from STOP study: E. S. Roach)**

1. Have you/your child recovered completely from the stroke?     Yes     No
2. Does your child need extra help with day-to-day activities compared to other children their age?     Yes     No
3. a) Has the stroke affected you/your child's emotional state, behavior and feelings about his/herself?     Yes     No  
 b) Does your child show any signs of depression?     Yes     No
4. Does the child use aids or assistive devices (e.g. splints, braces)?     Yes     No    Specify: \_\_\_\_\_

Ask patient to identify:

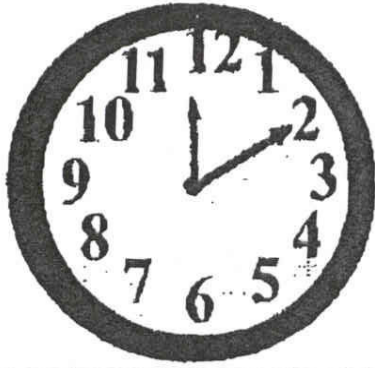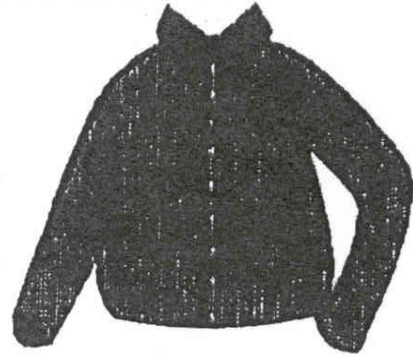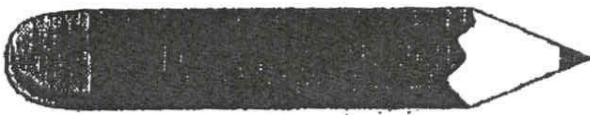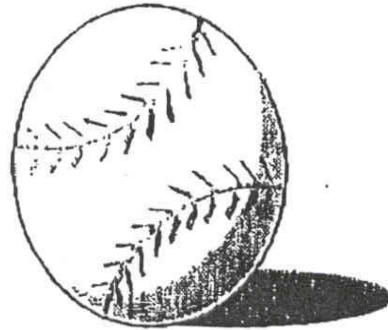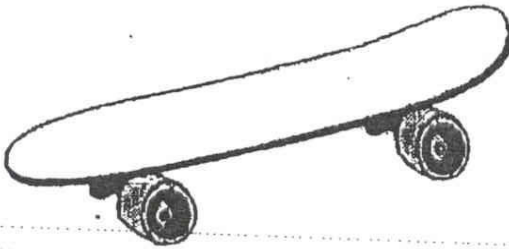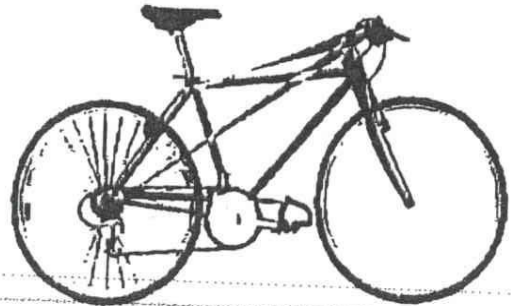

**WORKSHEET FOR DRAWING: DRAWING** Copy the Following Shapes

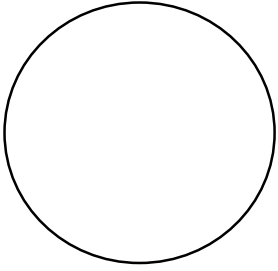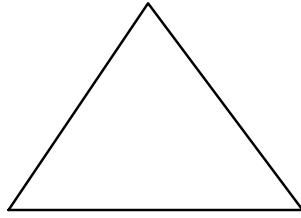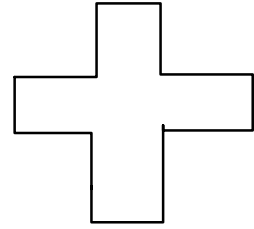

**Place an 'X' at the middle of each of the 4 lines below**

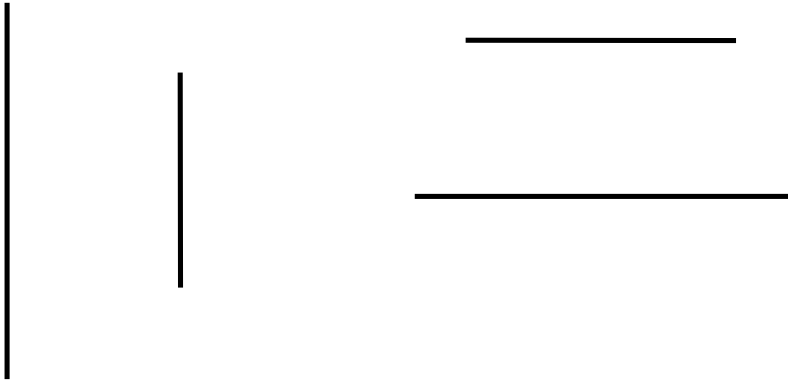

\*Children > 12 yrs.: Draw a Clock and put the numbers on it (use back of this page if needed):
