# Supplementary material
Source: PubMed Central journal article supplement (PMC3425845)
Supplement: supp_WNL.0b013e318266fc9a_Appendix_e-3.pdf [file supp_WNL.0b013e318266fc9a_Appendix_e-3.pdf]

**IPSS Recovery and Recurrence Questionnaire**

IPSS ID# \_\_\_\_\_ Site: \_\_\_\_\_ Date of assessment: Year \_\_\_ Month \_\_\_ Day \_\_\_

Method of Administration:  Parent interview in clinical setting  Mail-out  Telephone  Chart review

Person administering questionnaire: \_\_\_\_\_

Note: If child has died since discharge from hospital, please go directly to item 8 (skip items 1-7)

Q1. Has your child recovered completely from the stroke?  Yes  No

If no, please answer the following questions:

1A. Does your child have any **problems with strength, coordination, or sensation including vision or hearing, as a result of the stroke?** If yes, please choose which of the following are present in your child:

- |                                                               |                                                                                            |
|---------------------------------------------------------------|--------------------------------------------------------------------------------------------|
| <input type="checkbox"/> Developmental delay                  | <input type="checkbox"/> Difficulty with speaking clearly (problem with pronouncing words) |
| <input type="checkbox"/> Abnormal tone                        | <input type="checkbox"/> Difficulty with drinking, chewing or swallowing                   |
| <input type="checkbox"/> Weakness on one side of the body     | <input type="checkbox"/> Loss of sensation on one side of the body                         |
| <input type="checkbox"/> Weakness on one side of the face     | <input type="checkbox"/> Other sensory problems                                            |
| <input type="checkbox"/> Unsteadiness on one side of the body | <input type="checkbox"/> Difficulty with vision                                            |
| <input type="checkbox"/> Difficulty with hearing              |                                                                                            |

Other problems with strength or coordination; Describe: \_\_\_\_\_

Does the problem affect your child's day-to-day activities?  Yes  No

|                                                     | <u>Right side face or body</u> | <u>Left side face or body</u> |
|-----------------------------------------------------|--------------------------------|-------------------------------|
| Not Done                                            | n/t                            | n/t                           |
| None                                                | 0                              | 0                             |
| Mild but no impact on function                      | 0.5                            | 0.5                           |
| Moderate with some limitations with daily functions | 1                              | 1                             |
| Severe or Profound with missing function            | 2                              | 2                             |

1B. Does your child have difficulty **expressing him/herself verbally?** (Exclude dysarthrias or pronunciation problems)

|                                                     |     |
|-----------------------------------------------------|-----|
| Not Done                                            | n/t |
| None                                                | 0   |
| Mild but no impact on function                      | 0.5 |
| Moderate with some limitations with daily functions | 1   |
| Severe or Profound with missing function            | 2   |

Please describe: \_\_\_\_\_

1C. Does your child have **difficulty understanding what is said to her/him?**

|                                                     |     |
|-----------------------------------------------------|-----|
| Not Done                                            | n/t |
| None                                                | 0   |
| Mild but no impact on function                      | 0.5 |
| Moderate with some limitations with daily functions | 1   |
| Severe or Profound with missing function            | 2   |

Please describe: \_\_\_\_\_

1D. Does your child have difficulty with his/her **thinking or behavior?**

|                                                     |     |
|-----------------------------------------------------|-----|
| Not Done                                            | n/t |
| None                                                | 0   |
| Mild but no impact on function                      | 0.5 |
| Moderate with some limitations with daily functions | 1   |
| Severe or Profound with missing function            | 2   |

Please describe: \_\_\_\_\_

**TOTAL PARENTAL PSOM SCORE:** \_\_\_\_\_/10

**Q2. Does your child need extra help with day-to-day activities compared with other children of the same age?**  Yes  No

**Q3. Since the first stroke, has your child had another Stroke or Transient Ischemic Attack (TIA) or blood clot in any other blood vessel (e.g. in the leg, lung, heart, other location) ?**

Yes  No  Unknown

If yes, which *type*?

Unknown

Stroke in a brain artery (usual form of 'stroke')

Stroke in a brain vein ('sinus thrombosis')

TIA

Other blood clot: (State location of blood clot : \_\_\_\_\_ )

If yes, *when* was the recurrence (if unknown, please estimate)? Year \_\_\_\_\_ Month \_\_\_\_\_ Day \_\_\_\_\_

Did your child have a *CT/MRI* at the time of the recurrence?  Yes  No  Unknown

If yes, a) which test was done?  CT  MRI  Unknown

b) did the CT /MRI show a new stroke?  Yes  No  Unknown

Describe the **new** clinical symptoms at the time of the recurrence:

Difficulty walking

Difficulty using hand(s)

Difficulty speaking

Difficulty with vision

Difficulty with drinking, chewing or swallowing

Other, describe: \_\_\_\_\_

Describe how long the symptoms lasted with the most recent attack:

Less than 6hrs

6-24 hours

More than 24 hours

If there was more than one episode, how many episodes occurred? \_\_\_\_\_

What stroke treatment was he/she on at the beginning of the episode?

None

Aspirin

Low Molecular Weight Heparin (Enoxaparin, Loxaprin, injections under the skin)

Coumadin (blood thinning pill)  Other (describe): \_\_\_\_\_

**Q4. Does your child suffer from headaches or seizures since being discharged after the stroke(s)?**

Headache:  Yes  No

Seizures:  Yes  No If yes is he/she on a seizure medicine now?  Yes  No

**Q5. Have there been any other major health problems or procedures resulting from the stroke(s) or the stroke(s) treatment?**

Yes  No

If yes, describe: \_\_\_\_\_

**Q6. What medications are being used right now for stroke treatment?**

None

Aspirin

LMWH (blood thinner injected under the skin)

Coumadin (blood thinner pill)

Other (describe): \_\_\_\_\_

**Q7. What rehabilitation treatments is your child receiving now?**

None

Occupational Therapy

Physical Therapy

Speech therapy

Special education services

Other (describe): \_\_\_\_\_

**Q8. If your child is deceased, please specify:**

Date of death: Year \_\_\_\_\_ Month \_\_\_\_\_ Day \_\_\_\_\_

Cause of death: \_\_\_\_\_

**Comprehensive Stroke Family History Questionnaire (Optional)**

Instructions: Please answer the following questions as completely as possible.

**1. Has anyone in your child's family had a stroke?**

- a.  No
- b.  Yes

How is the person related to your child (i.e. aunt, uncle, grandmother, etc. and on which side of the family, mothers or fathers) and at what age did they stroke? Please list all relatives who have had a stroke:

---

---

---

**2. Has anyone in your child's family had a heart attack?**

- a.  No
- b.  Yes

How is the person related to your child (i.e. aunt, uncle, grandmother, etc. and on which side of the family, mothers or fathers) and at what age did they have their heart attack? Please list all relatives who have had a heart attack:

---

---

---

**3. Has anyone in your child's family had a blood clot in their arm, leg, or lung?**

- a.  No
- b.  Yes:

How is the person related to your child (i.e. aunt, uncle, grandmother, etc. and on which side of the family, mothers or fathers) and at what age did they have their blood clot? Please list all relatives who have had a blood clot:

---

---

---

**4. Has anyone in your child's family had more than one miscarriage?**

- a.  No
- b.  Yes:

How is the person related to your child (i.e. aunt, grandmother, etc. and on which side of the family, mothers or fathers) and how many miscarriages they have had? Please list all relatives who have had more than one miscarriage:

---

---

---

**5. Has anyone in your child's family had to take a blood thinner medication?**

- a.  No
- b.  Yes

How is the person related to your child (i.e. aunt, uncle, grandmother, etc. and on which side of the family, mothers or fathers) and why they were on blood thinner medication (if you know)? Please list all relatives who have taken blood thinning medication:

---

---

---
